# Supplementary material for: Effect of invasive mechanical ventilation on the diversity of the pulmonary microbiota
Source: PubMed Central journal article supplement (PMC9394019; doi:10.1186/s13054-022-04126-6), 2022-08-22
Supplement: 13054_2022_4126_MOESM1_ESM.pdf [file 13054_2022_4126_MOESM1_ESM.pdf]

| Name          | ncbi_tax<br>on_id | relative_abun<br>dance_avg<br>(%) | relative_abund<br>ance_med (%) | relative_abun<br>dance_std | relative_abund<br>ance_sum |
|---------------|-------------------|-----------------------------------|--------------------------------|----------------------------|----------------------------|
| Streptococcus | 1301              | 25.15195                          | 20.24485                       | 20.09812                   | 26510.15039                |
| Prevotella    | 838               | 15.6905                           | 13.508                         | 12.63123                   | 16459.32984                |
| Veillonella   | 29465             | 11.78943                          | 10.6363                        | 8.14652                    | 12272.80128                |
| Haemophilus   | 724               | 7.21314                           | 3.71328                        | 9.23792                    | 7501.66126                 |
| Neisseria     | 482               | 8.43433                           | 3.47866                        | 10.85882                   | 8788.57161                 |
| Lacibacter    | 649461            | 3.12483                           | 3.12483                        | 2.65985                    | 6.24965                    |
| Fusobacterium | 848               | 3.90686                           | 2.56794                        | 4.32871                    | 4035.79091                 |
| Leptotrichia  | 32067             | 2.68297                           | 1.24867                        | 3.84343                    | 2752.73029                 |
| Schaalia      | 2529408           | 1.85463                           | 0.99085                        | 2.29074                    | 1902.84671                 |
| Candidatus    | 282132            | 0.82377                           | 0.82377                        | 0.81263                    | 1.64755                    |
| Protochlamydi |                   |                                   |                                |                            |                            |
| a             |                   |                                   |                                |                            |                            |
| Bacteroides   | 816               | 1.52985                           | 0.81841                        | 2.45102                    | 1552.79988                 |
| Gemella       | 1378              | 1.68118                           | 0.68913                        | 2.86652                    | 1745.05994                 |
| Enterococcus  | 1350              | 1.06001                           | 0.68888                        | 1.17696                    | 1047.29456                 |
| Chroococcidio | 54298             | 0.65772                           | 0.65772                        | 0.61457                    | 1.31545                    |
| psis          |                   |                                   |                                |                            |                            |
| Porphyromona  | 836               | 1.6916                            | 0.6186                         | 2.92082                    | 1742.35142                 |
| s             |                   |                                   |                                |                            |                            |
| Rothia        | 32207             | 1.53047                           | 0.56631                        | 2.64651                    | 1573.32201                 |
| Actinomyces   | 1654              | 1.10177                           | 0.56311                        | 1.53581                    | 1137.02951                 |
| Atopobium     | 1380              | 1.22406                           | 0.4856                         | 1.68415                    | 1206.92322                 |
| Pseudoxantho  | 83618             | 0.52272                           | 0.39201                        | 0.51433                    | 7.84085                    |
| monas         |                   |                                   |                                |                            |                            |
| Planctopirus  | 1649480           | 0.34917                           | 0.34917                        | 0.33556                    | 0.69834                    |
| Sulfurihydrog | 212790            | 0.298                             | 0.298                          | 0.28122                    | 0.59599                    |
| enibium       |                   |                                   |                                |                            |                            |
| Selenomonas   | 970               | 0.67822                           | 0.28021                        | 1.1636                     | 678.21578                  |
| Nonlabens     | 363408            | 0.30272                           | 0.23461                        | 0.32797                    | 2.72447                    |
| Acidiphilium  | 522               | 0.22521                           | 0.22521                        | 0.2062                     | 0.45041                    |
| Allochromatiu | 85072             | 0.1989                            | 0.1989                         | 0.17078                    | 0.3978                     |
| m             |                   |                                   |                                |                            |                            |
| Lachnoanaero  | 1164882           | 0.44953                           | 0.18886                        | 0.66177                    | 434.24229                  |
| baculum       |                   |                                   |                                |                            |                            |
| Sphingobium   | 165695            | 0.7159                            | 0.1733                         | 1.73899                    | 30.78356                   |
| Curvibacter   | 281915            | 0.29927                           | 0.17264                        | 0.32792                    | 5.68613                    |
| Capnocytopha  | 1016              | 0.66568                           | 0.16071                        | 1.68223                    | 670.34005                  |
| ga            |                   |                                   |                                |                            |                            |
| Tepidiphilus  | 203470            | 4.25342                           | 0.13974                        | 8.37414                    | 127.60265                  |
| Rickettsia    | 780               | 0.46421                           | 0.13887                        | 0.62546                    | 11.60519                   |
| Gelidibacter  | 49279             | 0.13107                           | 0.13107                        | 0.11565                    | 0.26215                    |

|                           |         |         |         |         |           |
|---------------------------|---------|---------|---------|---------|-----------|
| Castellaniella            | 359336  | 0.12246 | 0.12246 | 0.12212 | 0.24491   |
| Bulleidia                 | 118747  | 0.2161  | 0.11152 | 0.33091 | 213.29377 |
| Granulicatella            | 117563  | 0.29736 | 0.10729 | 0.577   | 306.58009 |
| Borreliella               | 64895   | 0.52153 | 0.10136 | 0.72101 | 4.69373   |
| Cryobacteriu<br>m         | 69578   | 0.10028 | 0.10028 | 0.01804 | 0.20055   |
| Tessaracoccus             | 72763   | 0.1838  | 0.09868 | 0.21917 | 0.73521   |
| Campylobacte<br>r         | 194     | 0.24072 | 0.09756 | 0.37592 | 238.55764 |
| Aggregatibact<br>er       | 416916  | 0.32386 | 0.09035 | 0.81824 | 312.52673 |
| Entomoplasm<br>a          | 46238   | 0.11026 | 0.08292 | 0.09689 | 1.32317   |
| Vulcaniibacter<br>ium     | 1649512 | 0.34956 | 0.07571 | 0.73841 | 2.79649   |
| Fischerella               | 1190    | 0.11958 | 0.07447 | 0.14929 | 1.67417   |
| Nitratifractor            | 269260  | 0.1473  | 0.07099 | 0.16094 | 3.38784   |
| Herbihabitans             | 1884922 | 0.06902 | 0.06902 | 0.00195 | 0.13804   |
| Candidatus<br>Midichloria | 411566  | 0.1155  | 0.06522 | 0.11728 | 0.57749   |
| Salinimicrobiu<br>m       | 561367  | 0.06337 | 0.06337 | 0.06259 | 0.12674   |
| Niabella                  | 379899  | 0.32891 | 0.06167 | 0.42234 | 2.30239   |
| Peptostreptoco<br>ccus    | 1257    | 0.20812 | 0.05851 | 1.17143 | 191.88809 |
| Thermomonas               | 141948  | 0.46384 | 0.05642 | 0.76017 | 7.42145   |
| Massilia                  | 149698  | 0.06443 | 0.05619 | 0.05282 | 0.38658   |
| Alloprevotella            | 1283313 | 0.33268 | 0.05555 | 0.74819 | 293.42506 |
| Collimonas                | 202907  | 0.07805 | 0.05514 | 0.05631 | 0.54635   |
| Weeksella                 | 1013    | 0.05464 | 0.05464 | 0.04167 | 0.10929   |
| Gloeocapsa                | 102231  | 0.07338 | 0.05258 | 0.07804 | 0.66043   |
| Microvirga                | 186650  | 0.06527 | 0.05251 | 0.05612 | 0.26107   |
| Turneriella               | 338321  | 0.04743 | 0.04743 | 0.0471  | 0.09486   |
| Acidovorax                | 12916   | 3.28823 | 0.04674 | 8.92485 | 220.31118 |
| Variovorax                | 34072   | 0.40485 | 0.04612 | 0.96248 | 41.295    |
| Sandarakinorh<br>abdus    | 362865  | 0.04527 | 0.04527 | 0.01775 | 0.09053   |
| Borrelia                  | 138     | 0.04372 | 0.04372 | 0.02727 | 0.08744   |
| Parvimonas                | 543311  | 0.17004 | 0.04127 | 0.52215 | 157.11648 |
| Nubsella                  | 565005  | 0.04069 | 0.04069 | 0.03987 | 0.08138   |
| Phaeobacter               | 302485  | 0.04021 | 0.04021 | 0.0087  | 0.08042   |
| Treponema                 | 157     | 0.24217 | 0.03891 | 0.80258 | 218.19538 |
| Thermoanaero<br>bacterium | 28895   | 0.5428  | 0.03875 | 1.06779 | 5.42805   |

|                |         |         |         |         |           |
|----------------|---------|---------|---------|---------|-----------|
| Aeribacillus   | 1055323 | 0.17911 | 0.03853 | 0.34231 | 3.94043   |
| Methanotherm   | 155862  | 0.03548 | 0.03548 | 0.03468 | 0.07097   |
| ococcus        |         |         |         |         |           |
| Brucella       | 234     | 0.4971  | 0.03537 | 1.39728 | 96.93387  |
| Catonella      | 43996   | 0.07817 | 0.03455 | 0.2063  | 72.93028  |
| Leptospirillum | 179     | 0.03435 | 0.03435 | 0.03344 | 0.06869   |
| Propionimicro  | 203133  | 0.04944 | 0.03389 | 0.04844 | 0.24718   |
| bium           |         |         |         |         |           |
| Methanococcu   | 2184    | 0.03332 | 0.03332 | 0.0144  | 0.06663   |
| s              |         |         |         |         |           |
| Sulfuricurvum  | 286130  | 0.15968 | 0.03309 | 0.21339 | 2.3952    |
| Corynebacteri  | 1716    | 0.247   | 0.03237 | 1.56753 | 240.57743 |
| um             |         |         |         |         |           |
| Zhizhongheell  | 1649514 | 0.12682 | 0.03213 | 0.18047 | 0.63411   |
| a              |         |         |         |         |           |
| Chishuiella    | 1572663 | 0.03206 | 0.03206 | 0.02418 | 0.06411   |
| Bdellovibrio   | 958     | 0.15238 | 0.03171 | 0.34682 | 2.74284   |
| Halopelagius   | 1008195 | 0.03161 | 0.03161 | 0.01155 | 0.06321   |
| Dialister      | 39948   | 0.09807 | 0.0313  | 0.19997 | 90.80977  |
| Thermobifida   | 83677   | 0.11798 | 0.03043 | 0.14776 | 4.01116   |
| Thermithiobac  | 119979  | 0.02961 | 0.02961 | 0.01969 | 0.05921   |
| illus          |         |         |         |         |           |
| Flectobacillus | 101     | 0.60552 | 0.02786 | 1.47119 | 11.50482  |
| Halomonas      | 2745    | 0.3061  | 0.02764 | 1.15497 | 16.52923  |
| Runella        | 105     | 0.02721 | 0.02721 | 0.02679 | 0.05443   |
| Mitsuaria      | 65047   | 0.02555 | 0.0267  | 0.01686 | 0.2044    |
| Ohtaekwangia   | 1210119 | 0.05343 | 0.02629 | 0.06355 | 0.37402   |
| Butyriovibrio  | 830     | 0.11429 | 0.02588 | 0.23029 | 82.63167  |
| Novosphingob   | 165696  | 0.54392 | 0.02563 | 1.35723 | 31.00337  |
| ium            |         |         |         |         |           |
| Agrobacteriu   | 357     | 0.08284 | 0.02548 | 0.13325 | 0.6627    |
| m              |         |         |         |         |           |
| Paludibacteriu | 400060  | 0.11018 | 0.02532 | 0.16125 | 0.44072   |
| m              |         |         |         |         |           |
| Pedomicrobiu   | 47494   | 0.08551 | 0.02515 | 0.12006 | 1.36818   |
| m              |         |         |         |         |           |
| Megasphaera    | 906     | 0.12113 | 0.02506 | 0.35874 | 108.28837 |
| Thermocrinis   | 75905   | 0.02429 | 0.02429 | 0.00978 | 0.04857   |
| Mogibacteriu   | 86331   | 0.04099 | 0.02404 | 0.06867 | 37.05549  |
| m              |         |         |         |         |           |
| Phenylobacter  | 20      | 0.3204  | 0.02394 | 0.85275 | 7.04877   |
| ium            |         |         |         |         |           |
| Mucilaginibac  | 423349  | 0.02909 | 0.02305 | 0.0256  | 0.14546   |
| ter            |         |         |         |         |           |

|                   |         |         |         |         |           |
|-------------------|---------|---------|---------|---------|-----------|
| Tannerella        | 195950  | 0.08902 | 0.02304 | 0.22556 | 78.06714  |
| Rhizorhapis       | 1649487 | 0.023   | 0.023   | 0.0108  | 0.04601   |
| Thermobaculum     | 262406  | 0.16496 | 0.02271 | 0.25602 | 4.45393   |
| Cupriavidus       | 106589  | 0.30267 | 0.02219 | 0.80326 | 15.13353  |
| Persicobacter     | 59740   | 0.02208 | 0.02208 | 0.00578 | 0.04417   |
| Janthinobacterium | 29580   | 0.06363 | 0.0218  | 0.08524 | 1.27255   |
| Spiribacter       | 1335745 | 0.02166 | 0.02166 | 0.02136 | 0.04331   |
| Lautropia         | 47670   | 0.10815 | 0.02065 | 0.68018 | 82.94759  |
| Dechloromonas     | 73029   | 0.1725  | 0.02063 | 0.31559 | 2.41504   |
| Trichococcus      | 82802   | 0.02941 | 0.01968 | 0.03365 | 25.09085  |
| Aquifex           | 2713    | 0.01911 | 0.01911 | 0.01223 | 0.03823   |
| Mesoplasma        | 46239   | 0.03928 | 0.019   | 0.03503 | 0.1964    |
| Prochlorococcus   | 1218    | 0.01894 | 0.01894 | 0.00264 | 0.03788   |
| Lachnoclostridium | 1506553 | 0.09771 | 0.01779 | 0.3678  | 85.49867  |
| Sphaerotilus      | 34102   | 0.01708 | 0.01708 | 0.01681 | 0.03416   |
| Burkholderia      | 32008   | 0.23418 | 0.01706 | 0.83888 | 62.76101  |
| Catenulispora     | 414878  | 0.0183  | 0.01703 | 0.01372 | 0.07318   |
| Marivirga         | 869806  | 0.01657 | 0.01657 | 0.01551 | 0.03314   |
| Ramlibacter       | 174951  | 0.0391  | 0.01652 | 0.04948 | 0.15642   |
| Steroidobacter    | 469322  | 0.05863 | 0.01651 | 0.09568 | 1.9349    |
| Nitrosopumilus    | 338191  | 0.01536 | 0.01628 | 0.01319 | 0.06145   |
| Peptococcus       | 2740    | 0.12412 | 0.01626 | 0.27498 | 93.71041  |
| Porphyrobacter    | 1111    | 0.16362 | 0.01625 | 0.25246 | 3.10887   |
| Phaeospirillum    | 85265   | 0.01611 | 0.01611 | 0.01524 | 0.03221   |
| Cloacibacterium   | 501783  | 1.43296 | 0.01609 | 4.76264 | 73.08116  |
| Telluria          | 34069   | 1.21957 | 0.01583 | 4.55508 | 20.73268  |
| Emticicia         | 312278  | 0.05205 | 0.01575 | 0.06273 | 0.36434   |
| Myceligenas       | 253183  | 0.01477 | 0.01567 | 0.00744 | 0.1329    |
| Effusibacillus    | 1502725 | 0.04126 | 0.01563 | 0.05273 | 0.82526   |
| Ralstonia         | 48736   | 0.22634 | 0.01556 | 3.47453 | 121.31977 |
| Gracilibacillus   | 74385   | 0.01551 | 0.01551 | 0.01504 | 0.03103   |
| Paraliobacillus   | 200903  | 0.01547 | 0.01547 | 0.00149 | 0.03094   |
| Paucibacter       | 318147  | 0.01453 | 0.01543 | 0.0051  | 0.04358   |
| Enterobacter      | 547     | 0.02263 | 0.01536 | 0.02749 | 0.42993   |

|                    |         |         |         |         |           |
|--------------------|---------|---------|---------|---------|-----------|
| Akkermansia        | 239934  | 0.33826 | 0.01529 | 0.73812 | 35.51756  |
| Filifactor         | 44259   | 0.06336 | 0.01493 | 0.19414 | 40.23129  |
| Uliginosibacterium | 392735  | 0.01622 | 0.01477 | 0.01421 | 0.11353   |
| Methylobacterium   | 2282523 | 0.20731 | 0.01473 | 0.45147 | 12.43884  |
| Polynucleobacter   | 44013   | 0.24755 | 0.01465 | 0.6057  | 1.98041   |
| Persephonella      | 182899  | 0.02561 | 0.0145  | 0.02982 | 0.38411   |
| Cutibacterium      | 1912216 | 0.99317 | 0.0145  | 3.67808 | 161.88665 |
| Mesoflavibacter    | 444051  | 0.0144  | 0.0144  | 0.00314 | 0.02881   |
| Rhodoferax         | 28065   | 0.01523 | 0.01414 | 0.01275 | 0.21326   |
| Chelatococcus      | 28209   | 0.05559 | 0.01406 | 0.0867  | 0.27796   |
| Roseimaritima      | 1579506 | 0.01997 | 0.01398 | 0.02025 | 0.09983   |
| Ochrobactrum       | 528     | 0.08651 | 0.01393 | 0.18926 | 11.85131  |
| Rubinisphaera      | 1649490 | 0.053   | 0.01361 | 0.06185 | 0.15901   |
| Ferroplasma        | 74968   | 0.01344 | 0.01344 | 0.01262 | 0.02689   |
| Hydrogenophilus    | 70774   | 0.10471 | 0.01316 | 0.24323 | 1.88483   |
| Maribacter         | 252356  | 0.05468 | 0.01303 | 0.06611 | 0.38276   |
| Singulisphaera     | 466152  | 0.01703 | 0.01298 | 0.01538 | 0.15328   |
| Gloeobacter        | 33071   | 0.1251  | 0.01292 | 0.31216 | 1.50115   |
| Labrenzia          | 478070  | 0.01286 | 0.01286 | 0.00151 | 0.02573   |
| Lysobacter         | 68      | 0.02692 | 0.01285 | 0.03928 | 0.34999   |
| Pseudomonas        | 286     | 0.78908 | 0.01268 | 4.72885 | 453.71842 |
| Thermoplasmas      | 1434049 | 0.01131 | 0.0124  | 0.00843 | 0.03392   |
| Advenella          | 290425  | 0.01379 | 0.01232 | 0.01005 | 0.0965    |
| Cnuella            | 1648511 | 0.62997 | 0.01207 | 0.88143 | 1.8899    |
| Aquiflexum         | 280472  | 0.01183 | 0.01183 | 0.00975 | 0.02365   |
| Rhodovibrio        | 85274   | 0.01179 | 0.01179 | 0.00978 | 0.02358   |
| Kingella           | 32257   | 0.02896 | 0.01139 | 0.11106 | 24.58706  |
| Chloroflexus       | 1107    | 0.01777 | 0.01129 | 0.01748 | 0.1066    |
| Herbaspirillum     | 963     | 2.14059 | 0.01082 | 7.4105  | 667.86312 |
| Microbacterium     | 33882   | 0.28103 | 0.01054 | 0.68308 | 23.32563  |
| Gemmobacter        | 204456  | 0.01043 | 0.01043 | 0.00791 | 0.02086   |
| Promicromonospora  | 43676   | 0.01293 | 0.01033 | 0.01197 | 0.05171   |
| Staphylococcus     | 1279    | 0.17    | 0.01032 | 1.46461 | 152.65728 |
| Meiothermus        | 65551   | 0.08228 | 0.0103  | 0.12838 | 0.6582    |

|                     |         |         |         |         |          |
|---------------------|---------|---------|---------|---------|----------|
| Cardiobacteriu<br>m | 2717    | 0.01941 | 0.01017 | 0.03054 | 14.40299 |
| Parageobacillu<br>s | 1906945 | 0.08416 | 0.01015 | 0.22356 | 1.17819  |
| Rheinheimera        | 67575   | 0.11019 | 0.01002 | 0.3015  | 3.08523  |

**Table S1. Full list of 168 genera detected in  $\geq 2$  out of 1054 lung-relevant samples with median relative abundances  $\geq 0.01\%$ . Accessed the website of "<https://mbodymap.microbiome.cloud/#/mbodymap>" on July 3, 2022.**
